# Supplementary material for: Higher Dietary Acid Load Might Be a Potent Derivative Factor for Multiple Sclerosis: The Results from a Case–Control Study
Source: MDPI journal article supplement (doi:10.3390/nu15153311), 2023-07-26
Supplement: s1 [file s1]

**Supplementary Table 1.** Demographic characteristics and total intake of calories and macronutrient and dietary acid load in female and male<sup>1</sup>

| Variables <sup>2</sup>                         | Female<br>(n = 176)        | Male<br>(n = 63)           | P-value |
|------------------------------------------------|----------------------------|----------------------------|---------|
| Age (years)                                    | 34 (29, 41)                | 34 (30, 42)                | 0.661   |
| Body mass index, Kg/m <sup>2</sup> , Mean (SD) | 26.19 ± 3.98               | 25.96 ± 3.15               | 0.645   |
| Total calories intake (Kcal/day)               | 2319.52 (1906.24, 2754.85) | 2556.18 (2272.29, 3060.90) | 0.002   |
| Protein (gr/day)                               | 78.95 (60.13, 98.86)       | 89.22 (74.25, 106.83)      | 0.008   |
| Carbohydrates (gr/day)                         | 298.71 (235.09, 364.04)    | 337.35 (285.34, 429.74)    | 0.007   |
| Fat (gr/day)                                   | 92.75 (74.04, 117.28)      | 104.23 (82.98, 123.77)     | 0.011   |
| PRAL                                           | -9.08 (-20.78, 3.13)       | -7.71 (-21.53, 1.03)       | 0.827   |
| NEAP                                           | 38.93 (32.23, 49.68)       | 41.52 (33.28, 50.93)       | 0.483   |
| Protein/potassium                              | 0.023 (0.020, 0.028)       | 0.024 (0.020, 0.029)       | 0.483   |

<sup>1</sup> Using Mann–Whitney U or Independent Samples T-test, as appropriate

<sup>2</sup> Values are median (Q1–Q3) unless otherwise noted

BMI: body mass index, PRAL: Potential Renal Acid Load, NEAP: Net Endogenous Acid Production
